# Supplementary material for: WITHDRAWN: Underestimating the risk of developing Chronic Kidney Diseases Among the Jordanian Diabetic Patients
Source: Research Square preprint supplement (doi:10.21203/rs.3.rs-1435637/v1), 2022-03-28
Supplement: Supplementary file 1 [file 760074799cc98cc78463a380.docx]

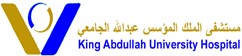


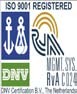

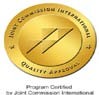


**ﻧﻤﻮﺫﺝ ﻣﻮﺍﻓﻘﺔ ﺍﻟﻤﺮﻳﺾ ﻋﻠﻰ ﺍﺟﺮﺍء ﺑﺤﺚ ﻋﻠﻤﻲ**

**ﺍﺳﻢ المريض: الرقم الطبي:**

اسم المشرف على البحث: **الدكتورة إنصاف المومني** رقم الهاتف:

**ﻋﻨﻮﺍﻥ** **البحث**: **تقييم كفاءة وظائف الكلى لدى مرضى السكري في الأردن**

#  ﻗﺒﻞ ﻣﻮﺍﻓﻘﺘﻲ ﻋﻠﻰ ﺍﻟﺒﺤﺚ ﺗﻢ ﺍﻋﻼﻣﻲ ﻣﻦ ﻗﺒﻞ ﺍﻟﺒﺎﺣﺚ ﺑﻤﺎ ﻳﻠﻲ :

1 - ﻣﻮﺍﻓﻘﺔ ﺍﻟﺠﻬﺎﺕ ﺍﻟﻤﻌﻨﻴﺔ ﻓﻲ ﺍﻟﻤﺴﺘﺸﻔﻰ ﻋﻠﻰ ﺍﺟﺮﺍء ﺍﻟﺒﺤﺚ.

2 - ﺍﻫﺪﺍﻑ ﺍﻟﺒﺤﺚ ﻭﺍﺟﺮﺍءﺍﺗﻪ.

3 - ﺍﻳﺔ ﺍﺧﻄﺎﺭ ﻣﻤﻜﻨﺔ ﻭﻣﺘﻮﻗﻌﺔ ﻭﺃﻳﺔ ﻣﻀﺎﻳﻘﺎﺕ ﺍﻭ ﻣﻨﺎﻓﻊ ﻧﺎﺗﺠﺔ ﻋﻦ ﺍﻟﺒﺤﺚ.

4 - ﺍﻳﺔ ﺍﺟﺮﺍءﺍﺕ ﺍﻭ ﻋﻼﺟﺎﺕ ﺑﺪﻳﻠﺔ ﻭﻣﺤﺘﻤﻠﺔ.

5 - ﺍﺣﺘﻤﺎﻝ ﺧﻄﻮﺭﺓ ﻏﻴﺮ ﻣﺘﻮﻗﻌﺔ.

6 - ﺍﻳﺔ ﺗﻌﻮﻳﻀﺎﺕ ﺍﻭ ﻋﻼﺝ ﻁﺒﻲ ﻣﺆﻣﻦ ﻟﻲ ﻓﻲ ﺣﺎﻝ ﺣﺪﻭﺙ ﺍﺫﻯ ﺍﻭ ﺿﺮﺭ ﻣﺎ ﻧﺘﻴﺠﺔ ﺍﻟﺒﺤﺚ.

7 - ﺍﻟﻤﺪﺓ ﺍﻟﺰﻣﻨﻴﺔ ﺍﻟﻼﺯﻣﺔ ﻟﻠﺒﺤﺚ .

8 - ﻛﻴﻔﻴﺔ ﺍﻟﺤﻔﺎﻅ ﻋﻠﻰ ﺳﺮﻳﺔ ﺍﻟﻤﻌﻠﻮﻣﺎﺕ.

9 - ﺍﻟﺤﺎﻻﺕ ﺍﻟﺘﻲ ﻣﻤﻜﻦ ﺍﻥ ﺗﺤﺚ ﺍﻟﺒﺎﺣﺚ ﻋﻠﻰ ﺍﻳﻘﺎﻓﻲ ﻋﻦ ﺍﻟﻤﺸﺎﺭﻛﺔ ﻓﻲ ﺍﻟﺒﺤﺚ.

10 أﻱ ﺟﻬﺪ ﺍﺿﺎﻓﻲ ﻣﻤﻜﻦ ﺍﻥ ﺍﺑﺬﻟﻪ ﻟﻐﺎﻳﺔ ﺍﻟﺒﺤﺚ.

11 -ﻣﺎﺫﺍ ﻳﺤﺼﻞ ﻓﻲ ﺣﺎﻝ ﻗﺮﺭﺕ ﺍﻥ ﺍﺗﻮﻗﻒ ﻋﻦ ﺍﻟﻤﺸﺎﺭﻛﺔ ﻓﻲ ﺍﻟﺒﺤﺚ.

12 -ﻣﺘﻰ ﻳﺘﻮﺟﺐ ﺍﻋﻼﻣﻲ ﺑﺎﺳﺘﻨﺘﺎﺟﺎﺕ ﺟﺪﻳﺪﺓ ﻣﻤﻜﻦ ﺍﻥ ﺗﺆﺛﺮ ﻋﻠﻰ ﻋﺰﻳﻤﺘﻲ ﻓﻲ ﺍﻟﻤﺸﺎﺭﻛﺔ ﻓﻲ ﺍﻟﺒﺤﺚ.

 ﺇﺫﺍ ﻛﺎﻥ ﻟﺪﻳﻚ ﺍﺳﺌﻠﺔ ﻣﺎ ﺗﺘﻌﻠﻖ ﺑﺤﻘﻮﻗﻚ ﻛﻤﺸﺎﺭﻙ ﻓﻲ ﻫﺬﺍ ﺍﻟﺒﺤﺚ ﺍﻭ ﻓﻴﻤﺎ ﻳﺘﻮﺟﺐ ﻋﻠﻴﻚ ﻋﻤله في حال اصابتك بأذى أو بضرر فمن الممكن الاتصال في أي وقت من الأوقات بالدكتورة إنصاف المومني , على الرقم 0772203674

- مشاركتك في هذا البحث اختيارية فلن تعاقب أو تخسر أية منافع في حال قررت عدم المشاركة أو التوقف عن المشاركة في أي وقت.
- بمجرد توقيعك على هذا المستند فأنت تقر بأنك توافق اختياريا على المشاركة في هذا البحث و أن المعلومات المدونة أعلاه قد شرحت لك بالكامل.

| ﺗﻮﻗﻴﻌﻪ  ..................................................................................... | ﺍﺳﻢ ﺍﻟﻤﺸﺎﺭﻙ  ..................................................................................... | ﺍﻟﺘﺎﺭﻳﺦ  ..................................................................................... |
| --- | --- | --- |
| ﺗﻮﻗﻴﻌﻪ  ..................................................................................... | ﺍﺳﻢ ﺍﻟﻤﺸﺮﻑ ﻋﻠﻰ ﺍﻟﺒﺤﺚ    .......................................... | ﺍﻟﺘﺎﺭﻳﺦ  ..................................................................................... |

 ﻣﻼﺣﻈﺔ ﻫﺎﻣﺔ: ﻳﺠﺐ ﺣﻔﻆ ﻧﺴﺨﺔ ﻣﻦ ﻫﺬﺍ ﺍﻟﻨﻤﻮﺫﺝ ﻓﻲ ﺍﻟﻤﻠﻒ ﺍﻟﻄﺒﻲ ﻟﻠﻤﺸﺎﺭﻙ

**F3GM7601**
