# Supplementary material for: WITHDRAWN: Underestimating the risk of developing Chronic Kidney Diseases Among the Jordanian Diabetic Patients
Source: Research Square preprint supplement (doi:10.21203/rs.3.rs-1435637/v1), 2022-03-28
Supplement: Supplementary file 1 [file cc932c5609cdf51a5d1f8885.docx]

**Data Collection Form**

**Research Title: The Assessment of Kidney Function in Patients with Diabetes Miletus in Jordan**

**Section 1: Participant Characteristics**

Participant number: Participant name: Date of enrolment: Clinic: Mobile number:

Age (years): Sex:

Weight (kg): Height(cm): BMI:

Income (JD):

Smoking status: current (……… packs/day) / former / never smoke

**Section 2: Clinical variables**

| Duration of diabetes |  | Cr in urine |  |
| --- | --- | --- | --- |
| hypertension |  | Albumin/ creatinine ratio |  |
| Anemia |  | eGFR |  |
| hyperlipidemia |  | Evidence of kidney damage |  |
| Proteinurea |  | kidney function status |  |
| HbA1c |  |  |  |
| Scr |  |  |  |
| Albumin urine level |  |  |  |

Kidney function status:

| Kidney function status | eGFR | Evidence of kidney damage |
| --- | --- | --- |
| Normal kidney function | => 60 | - |
| Stage 1 CKD | => 90 | + |
| Stage 2 CKD | 60-89 | + |
| Stage 3 CKD | 30-59 | +/- |
| Stage 4 CKD | 15 -29 | +/- |
| Stage 5 CKD | < 15 | +/- |
